# Supplementary material for: Highly selective generation of vanillin by anodic degradation of lignin: a combined approach of electrochemistry and product isolation by adsorption
Source: publisher site journal article supplement (doi:10.3762/bjoc.11.53), 2015-04-13
Supplement: Additional file 1 [file 1860-5397-11-53-S1.pdf]

# Supporting Information File 1

for

## Highly selective generation of vanillin by anodic degradation of lignin: a combined approach of electrochemistry and product isolation by adsorption

Dominik Schmitt<sup>1</sup>, Carolin Regenbrecht<sup>1,2</sup>, Marius Hartmer<sup>1</sup>, Florian Stecker<sup>2</sup>, and Siegfried R. Waldvogel<sup>\*1</sup>

Address: <sup>1</sup> Institute for Organic Chemistry, Johannes Gutenberg University Mainz, Duesbergweg 10 – 14, 55128 Mainz (Germany) and <sup>2</sup> BASF SE, GCN/ES—M311, 67056 Ludwigshafen (Germany)

Email: Siegfried R. Waldvogel - waldvogel@uni-mainz.de

\* Corresponding author

# Information about materials

## Electrode materials

The applied Ni foam is displayed in Figure S1.

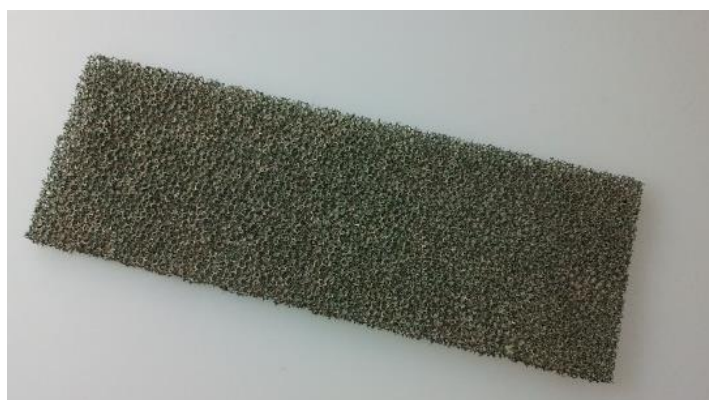

**Figure S1:** Ni foam electrode applied for the electrochemical degradation of lignin.

Characteristics of further electrode materials applied for the electrochemical degradation of lignin are listed in Table S1.

**Table S1: Applied electrode materials and compositions of corresponding alloys.**

| Entry | Anode                     | UNS-#  | Alloy base | Alloy Composition / %                                        |
|-------|---------------------------|--------|------------|--------------------------------------------------------------|
| 1     | Ni (planar)               | -      | -          | -                                                            |
| 2     | Monel 400k                | N04400 | Ni         | C 0.3/Mn 2.0/Fe 2.5/Si 0.5/Cu 28.0-34.0                      |
| 3     | Nichem 1151 (planar)      | -      | Ni         | P 11.6 – 11.8                                                |
| 4     | Co (planar)               | -      | -          | -                                                            |
| 5     | Stellite 21 (planar)      | W73021 | Co         | Cr 26.0-29.0/Mo 4.5-6.0/C 0.2-0.4/Ni 2.0-3.0/Fe,Si,Mn traces |
| 6     | Ni foam                   | -      | -          | -                                                            |
| 7     | Stainless steel net (V4A) | S31603 | Fe         | C≤0.03/Si≤1.0/Mn≤2.0/Cr 16.5-18.5/Mo 2.0-2.5/Ni 10.0-14.0    |

## Strongly basic anion exchange resins

Different strongly basic anion exchange resins were applied for the adsorption of vanillin in batch experiments as well as in continuous approaches which are listed in Table S2.

**Table S2: Strongly basic anion exchange resins for vanillin adsorption.**

| Resin            | Commercial name          | Ionic function             | Particle size (diameter) [mm] | Exchange capacity [meq/mL] |
|------------------|--------------------------|----------------------------|-------------------------------|----------------------------|
| a <sup>[A]</sup> | Reillex HPQ IE Resin     | <i>N</i> -Methylpyridinium | 0.3 - 1.0                     | >4.00                      |
| b <sup>[B]</sup> | Amberlite IRA 910 Cl     | Tetraalkylammonium         | 0.5 - 0.8                     | 1.00                       |
| c <sup>[B]</sup> | Amberlite IRA 402 OH     | Tetraalkylammonium         | 0.7 – 0.9                     | 0.95                       |
| d <sup>[B]</sup> | Ambersep 900 OH          | Tetraalkylammonium         | n.a.                          | 0.80                       |
| e <sup>[B]</sup> | Dowex Monosphere 550a OH | Tetraalkylammonium         | 0.5 – 0.6                     | 1.10                       |
| f <sup>[C]</sup> | Applexion XA 4141 Cl     | Tetraalkylammonium         | n.a.                          | 0.80                       |

**[A] Polyvinylpyridine divinylbenzene backbone. [B] Polystyrene divinylbenzene backbone. [C]**

**Polyacrylate divinylbenzene backbone. n.a. = Not available.**
